# Supplementary material for: Genome-wide analysis of the H3K27me3 epigenome and transcriptome in Brassica rapa
Source: PubMed Central journal article supplement (PMC6892454; doi:10.1093/gigascience/giz147), 2019-12-04

## Genome-wide analysis of the H3K27me3 epigenome and transcriptome in *Brassica rapa* --Manuscript Draft--

|                                                    |                                                                                                                                                                                                                                                                                                                                                                                                                                                                                                                                                                                                                                                                                                                                                                                                                                                                                                                                                                                                                                                                                                                                                                                                                                                                                                                                                                                                                                                                                                                                                                                                                                                                                                                                                                                                                                                                                                                                   |                       |
|----------------------------------------------------|-----------------------------------------------------------------------------------------------------------------------------------------------------------------------------------------------------------------------------------------------------------------------------------------------------------------------------------------------------------------------------------------------------------------------------------------------------------------------------------------------------------------------------------------------------------------------------------------------------------------------------------------------------------------------------------------------------------------------------------------------------------------------------------------------------------------------------------------------------------------------------------------------------------------------------------------------------------------------------------------------------------------------------------------------------------------------------------------------------------------------------------------------------------------------------------------------------------------------------------------------------------------------------------------------------------------------------------------------------------------------------------------------------------------------------------------------------------------------------------------------------------------------------------------------------------------------------------------------------------------------------------------------------------------------------------------------------------------------------------------------------------------------------------------------------------------------------------------------------------------------------------------------------------------------------------|-----------------------|
| <b>Manuscript Number:</b>                          | GIGA-D-19-00256                                                                                                                                                                                                                                                                                                                                                                                                                                                                                                                                                                                                                                                                                                                                                                                                                                                                                                                                                                                                                                                                                                                                                                                                                                                                                                                                                                                                                                                                                                                                                                                                                                                                                                                                                                                                                                                                                                                   |                       |
| <b>Full Title:</b>                                 | Genome-wide analysis of the H3K27me3 epigenome and transcriptome in <i>Brassica rapa</i>                                                                                                                                                                                                                                                                                                                                                                                                                                                                                                                                                                                                                                                                                                                                                                                                                                                                                                                                                                                                                                                                                                                                                                                                                                                                                                                                                                                                                                                                                                                                                                                                                                                                                                                                                                                                                                          |                       |
| <b>Article Type:</b>                               | Research                                                                                                                                                                                                                                                                                                                                                                                                                                                                                                                                                                                                                                                                                                                                                                                                                                                                                                                                                                                                                                                                                                                                                                                                                                                                                                                                                                                                                                                                                                                                                                                                                                                                                                                                                                                                                                                                                                                          |                       |
| <b>Funding Information:</b>                        | Ministerio de Economía, Industria y Competitividad, Gobierno de España (BES-2016-078939)                                                                                                                                                                                                                                                                                                                                                                                                                                                                                                                                                                                                                                                                                                                                                                                                                                                                                                                                                                                                                                                                                                                                                                                                                                                                                                                                                                                                                                                                                                                                                                                                                                                                                                                                                                                                                                          | Miss Laura Poza-Viejo |
|                                                    | Ministerio de Economía, Industria y Competitividad, Gobierno de España (SEV-2016-0672)                                                                                                                                                                                                                                                                                                                                                                                                                                                                                                                                                                                                                                                                                                                                                                                                                                                                                                                                                                                                                                                                                                                                                                                                                                                                                                                                                                                                                                                                                                                                                                                                                                                                                                                                                                                                                                            | Not applicable        |
|                                                    | Ministerio de Economía, Industria y Competitividad, Gobierno de España (BIO2015-68031-R)                                                                                                                                                                                                                                                                                                                                                                                                                                                                                                                                                                                                                                                                                                                                                                                                                                                                                                                                                                                                                                                                                                                                                                                                                                                                                                                                                                                                                                                                                                                                                                                                                                                                                                                                                                                                                                          | Dr. Pedro Crevillén   |
|                                                    | Ministerio de Economía, Industria y Competitividad, Gobierno de España (RYC-2013-14689)                                                                                                                                                                                                                                                                                                                                                                                                                                                                                                                                                                                                                                                                                                                                                                                                                                                                                                                                                                                                                                                                                                                                                                                                                                                                                                                                                                                                                                                                                                                                                                                                                                                                                                                                                                                                                                           | Dr. Pedro Crevillén   |
| <b>Abstract:</b>                                   | <p><b>Background</b></p> <p>Genome-wide maps of histone modifications have been obtained for several plant species. However, most studies focus on model systems and do not enforce FAIR data management principles. Here we study the histone H3 lysine 27 trimethylation (H3K27me3) epigenome and associated transcriptome of <i>Brassica rapa</i>, an important vegetable cultivated world-wide.</p> <p><b>Findings</b></p> <p>We performed H3K27me3 chromatin immunoprecipitation followed by high-throughput sequencing and a transcriptomic analysis by 3'-end RNA sequencing from <i>B. rapa</i> leaves and inflorescences. To analyze these data we developed a reproducible epigenomic analysis pipeline using Galaxy and Jupyter, wrapped into Docker images. We found that H3K27 methylation covers about a third of all <i>B. rapa</i> protein-coding genes and its presence correlates with low transcript levels. The comparative analysis between leaves and inflorescences suggested that the expression of various floral regulatory genes during development depends on H3K27 methylation. To demonstrate the importance of H3K27me3 for <i>B. rapa</i> development, we characterized a mutant line deficient in the H3K27 methyltransferase activity. We found that <i>braA.cif</i> mutant plants presented pleiotropic alterations, e. g. curly leaves due to increased expression and reduced H3K27me3 levels at AGAMOUS-like loci.</p> <p><b>Conclusions</b></p> <p>We characterized the epigenetic mark H3K27me3 at genome-wide levels and provide genetic evidence for its relevance in <i>B. rapa</i> development. Our work reveals the epigenomic landscape of H3K27me3 in <i>B. rapa</i> and provide novel genomics datasets and bioinformatics analytical resources. We anticipate that this work will lead the way to further epigenomic studies in the complex genome of <i>Brassica</i> crops.</p> |                       |
| <b>Corresponding Author:</b>                       | Pedro Crevillén<br>Instituto Nacional de Investigacion y Tecnologia Agraria y Alimentaria<br>Pozuelo de Alarcón, Madrid SPAIN                                                                                                                                                                                                                                                                                                                                                                                                                                                                                                                                                                                                                                                                                                                                                                                                                                                                                                                                                                                                                                                                                                                                                                                                                                                                                                                                                                                                                                                                                                                                                                                                                                                                                                                                                                                                     |                       |
| <b>Corresponding Author Secondary Information:</b> |                                                                                                                                                                                                                                                                                                                                                                                                                                                                                                                                                                                                                                                                                                                                                                                                                                                                                                                                                                                                                                                                                                                                                                                                                                                                                                                                                                                                                                                                                                                                                                                                                                                                                                                                                                                                                                                                                                                                   |                       |
| <b>Corresponding Author's Institution:</b>         | Instituto Nacional de Investigacion y Tecnologia Agraria y Alimentaria                                                                                                                                                                                                                                                                                                                                                                                                                                                                                                                                                                                                                                                                                                                                                                                                                                                                                                                                                                                                                                                                                                                                                                                                                                                                                                                                                                                                                                                                                                                                                                                                                                                                                                                                                                                                                                                            |                       |
| <b>Corresponding Author's Secondary</b>            |                                                                                                                                                                                                                                                                                                                                                                                                                                                                                                                                                                                                                                                                                                                                                                                                                                                                                                                                                                                                                                                                                                                                                                                                                                                                                                                                                                                                                                                                                                                                                                                                                                                                                                                                                                                                                                                                                                                                   |                       |

|                                                                                                                                                                                                                                                                                                                                                                                                                                                                                                                                     |                       |
|-------------------------------------------------------------------------------------------------------------------------------------------------------------------------------------------------------------------------------------------------------------------------------------------------------------------------------------------------------------------------------------------------------------------------------------------------------------------------------------------------------------------------------------|-----------------------|
| <b>Institution:</b>                                                                                                                                                                                                                                                                                                                                                                                                                                                                                                                 |                       |
| <b>First Author:</b>                                                                                                                                                                                                                                                                                                                                                                                                                                                                                                                | Miriam Payá-Milans    |
| <b>First Author Secondary Information:</b>                                                                                                                                                                                                                                                                                                                                                                                                                                                                                          |                       |
| <b>Order of Authors:</b>                                                                                                                                                                                                                                                                                                                                                                                                                                                                                                            | Miriam Payá-Milans    |
|                                                                                                                                                                                                                                                                                                                                                                                                                                                                                                                                     | Laura Poza-Viejo      |
|                                                                                                                                                                                                                                                                                                                                                                                                                                                                                                                                     | Patxi San Martín-Uriz |
|                                                                                                                                                                                                                                                                                                                                                                                                                                                                                                                                     | David Lara-Astiaso    |
|                                                                                                                                                                                                                                                                                                                                                                                                                                                                                                                                     | Mark Wilkinson        |
|                                                                                                                                                                                                                                                                                                                                                                                                                                                                                                                                     | Pedro Crevillén       |
| <b>Order of Authors Secondary Information:</b>                                                                                                                                                                                                                                                                                                                                                                                                                                                                                      |                       |
| <b>Additional Information:</b>                                                                                                                                                                                                                                                                                                                                                                                                                                                                                                      |                       |
| <b>Question</b>                                                                                                                                                                                                                                                                                                                                                                                                                                                                                                                     | <b>Response</b>       |
| Are you submitting this manuscript to a special series or article collection?                                                                                                                                                                                                                                                                                                                                                                                                                                                       | No                    |
| <p><b>Experimental design and statistics</b></p> <p>Full details of the experimental design and statistical methods used should be given in the Methods section, as detailed in our <a href="#">Minimum Standards Reporting Checklist</a>. Information essential to interpreting the data presented should be made available in the figure legends.</p> <p>Have you included all the information requested in your manuscript?</p>                                                                                                  | Yes                   |
| <p><b>Resources</b></p> <p>A description of all resources used, including antibodies, cell lines, animals and software tools, with enough information to allow them to be uniquely identified, should be included in the Methods section. Authors are strongly encouraged to cite <a href="#">Research Resource Identifiers</a> (RRIDs) for antibodies, model organisms and tools, where possible.</p> <p>Have you included the information requested as detailed in our <a href="#">Minimum Standards Reporting Checklist</a>?</p> | Yes                   |

|                                                                                                                                                                                                                                                                                                                                                                                                                                                                                                                                                         |            |
|---------------------------------------------------------------------------------------------------------------------------------------------------------------------------------------------------------------------------------------------------------------------------------------------------------------------------------------------------------------------------------------------------------------------------------------------------------------------------------------------------------------------------------------------------------|------------|
| <p><b>Availability of data and materials</b></p> <p>All datasets and code on which the conclusions of the paper rely must be either included in your submission or deposited in <a href="#">publicly available repositories</a> (where available and ethically appropriate), referencing such data using a unique identifier in the references and in the “Availability of Data and Materials” section of your manuscript.</p> <p>Have you have met the above requirement as detailed in our <a href="#">Minimum Standards Reporting Checklist</a>?</p> | <p>Yes</p> |
|---------------------------------------------------------------------------------------------------------------------------------------------------------------------------------------------------------------------------------------------------------------------------------------------------------------------------------------------------------------------------------------------------------------------------------------------------------------------------------------------------------------------------------------------------------|------------|

## **Genome-wide analysis of the H3K27me3 epigenome and transcriptome in *Brassica rapa***

Miriam Payá-Milans<sup>1,†</sup>, Laura Poza-Viejo<sup>1,†</sup>, Patxi San Martín-Uriz<sup>2</sup>, David Lara-Astiaso<sup>2</sup>, Mark Wilkinson<sup>1</sup> and Pedro Crevillén<sup>1,\*</sup>

<sup>1</sup>Centro de Biotecnología y Genómica de Plantas (CBGP), Universidad Politécnica de Madrid (UPM) - Instituto Nacional de Investigación y Tecnología Agraria y Alimentaria (INIA), Pozuelo de Alarcón (Madrid), Spain

<sup>2</sup>Centro de Investigación Médica Aplicada (CIMA), Universidad de Navarra, Pamplona, Spain

**\*Correspondence address:** Pedro Crevillén, Centro de Biotecnología y Genómica de Plantas (CBGP), Universidad Politécnica de Madrid (UPM) - Instituto Nacional de Investigación y Tecnología Agraria y Alimentaria (INIA), Pozuelo de Alarcón (Madrid), Spain. E-mail: [crevillen.pedro@inia.es](mailto:crevillen.pedro@inia.es) <http://orcid.org/0000-0003-1276-9792>

<sup>†</sup>Equal contributions.

## **Abstract**

### **Background**

Genome-wide maps of histone modifications have been obtained for several plant species. However, most studies focus on model systems and do not enforce FAIR data management principles. Here we study the histone H3 lysine 27 trimethylation (H3K27me3) epigenome and associated transcriptome of *Brassica rapa*, an important vegetable cultivated world-wide.

### **Findings**

We performed H3K27me3 chromatin immunoprecipitation followed by high-throughput sequencing and a transcriptomic analysis by 3'-end RNA sequencing from *B. rapa* leaves and inflorescences. To analyze these data we developed a reproducible epigenomic analysis pipeline using Galaxy and Jupyter, wrapped into Docker images. We found that H3K27 methylation covers about a third of all *B. rapa* protein-coding genes and its presence correlates with low transcript levels. The comparative analysis between leaves and inflorescences suggested that the expression of various floral regulatory genes during development depends on H3K27 methylation. To demonstrate the importance of H3K27me3 for *B. rapa* development, we characterized a mutant line deficient in the H3K27 methyltransferase activity. We found that *braA.clf* mutant plants presented pleiotropic alterations, e. g. curly leaves due to increased expression and reduced H3K27me3 levels at AGAMOUS-like loci.

### **Conclusions**

We characterized the epigenetic mark H3K27me3 at genome-wide levels and provide genetic evidence for its relevance in *B. rapa* development. Our work reveals the epigenomic landscape of H3K27me3 in *B. rapa* and provide novel genomics datasets and bioinformatics analytical resources. We anticipate that this work will lead the way to further epigenomic studies in the complex genome of *Brassica* crops.

## Background

Epigenetic regulation, defined as altered heritable gene expression in the absence of DNA sequence changes, is essential for development and differentiation [1]. The epigenome comprises alternative chromatin states that can impact gene activity. These include DNA methylation, the incorporation of histone variants and the post-transcriptional modification of histones – like acetylation or methylation on residues in the histone tails which can ultimately modify the interaction with DNA. Epigenetic marks accumulate in response to internal and environmental cues and persist through mitosis during the life span of the organism. A remarkable finding is the extent of the evolutionary conservation in key regulators and mechanisms across the plant and animal kingdoms suggesting that a very ancient mechanism underlies this epigenetic regulation [2].

The trimethylation of histone H3 lysine 27 (H3K27me3) [2–4] is one of the best examples of epigenetic regulation of the gene expression programs. H3K27me3 generally anticorrelates with gene repression and marks the so-called facultative heterochromatin, a fraction of the genome where gene expression is repressed but can be activated in response to developmental or environmental signals [5]. This epigenetic mark is deposited at target genes by specific histone methyltransferases as part of the Polycomb repressive complex 2 (PRC2). The PRC2 complex, which is conserved from animal to plants, comprises a set of core components and several accessory subunits [5,6]. In the model plant *Arabidopsis thaliana* (hereinafter referred to as *Arabidopsis*) the core PRC2 subunits are well conserved and H3K27 methylation is crucial for plant development [3]. During plant growth, different sets of genes are expressed at different organs or tissues and the PRC2 complex is needed to maintain these gene expression patterns [5]. The exact mechanism through which H3K27 methylation represses gene expression is not fully understood [5,6], but H3K27me3 is considered a hallmark of gene repression because it is tightly associated with gene silencing.

In plants, H3K27 methylation is crucial for developmental transitions like gametophyte formation, seed germination and floral initiation [3,4]. In *Arabidopsis*, at least 20% of protein-coding genes are covered by H3K27me3 in a given organ [7,8]; and similar results have been obtained in rice, maize and the model cereal *Brachypodium distachyon*, suggesting a conserved role of this epigenetic mark in plant development [9–11]. The importance of this histone modification is highlighted by recent reports showing that up to 60% of protein-coding genes are silenced by H3K27me3 at some specific plant cell types [12].

The Brassicaceae or Cruciferae family includes *Arabidopsis* and several important crops. The *Brassica* genus includes a number of condiments and vegetables as well as economically important oilseed crops. Brassica crops have complex genomes that underwent a whole genome triplication with subsequent genome rearrangements and chromosome reduction after the divergence from a common ancestor with *Arabidopsis* about 15 million years ago [13,14]. Therefore, the mesohexaploid *Brassica* genomes like *Brassica rapa* (turnip, field mustard; genome AA), *Brassica nigra* (black mustard; genome BB) and *Brassica oleracea* (cabbage; genome CC) are predicted to encode up to three orthologs of each *Arabidopsis* gene. Within the *Brassica* genus, the diploid *B. rapa* is considered a model for genomic studies because it has a small genome size that makes up half of the genomes of the allotetraploids *Brassica juncea* (indian mustard; AABB) and *Brassica napus* (rapeseed; AACC), which are relevant oilseed crops worldwide. *B. rapa* displays an extreme morphological diversity and includes economically important vegetables and oilseed crops [15,16]. In addition, the *B. rapa* (Chinese cabbage, Chiifu-401) genome has been fully sequenced and annotated and hundreds of accessions have been re-sequenced [14,16,17].

Despite intense epigenetic research in *Arabidopsis*, genome-wide epigenomic studies in Brassica crops are scarce. We are interested in understanding the epigenetic regulation underlying key agronomic traits in Brassicaceae. To start answering this question, here we study the genome-wide levels of H3K27me3 in leaves and inflorescences of *B. rapa* R-o-18, an oilseed variety. We found that H3K27 methylation is associated with gene silencing and decorate more than 25% of *B. rapa* protein coding genes. Comparative analyses between leaves and inflorescences show that the expression of a number of floral regulators correlates with dynamic changes in H3K27 methylation. Phenotypic characterization of a mutant in the histone methyltransferase *BraA.CLF* revealed the importance of H3K27me3 for proper *B. rapa* development. Mutant *braA.clf* plants showed reduced H3K27 methylation and high expression levels of floral identity genes in leaves resulting in a number of pleiotropic developmental alterations. Our work highlights the importance of H3K27me3 deposition in the regulation of developmental transitions in plants and leads the way to further epigenomic studies in Brassica crops.

## Data Description

In this work we obtained the genome-wide profile of the epigenetic mark H3K27me3 in *B. rapa*. We performed chromatin immunoprecipitation followed by high-throughput sequencing (ChIP-seq) from leaves and inflorescences. To correlate histone methylation and messenger RNA (mRNA) levels, we extracted RNA from the same plant samples and 3'-end RNA sequencing (3'RNA-seq) was performed. To uncover the relevance of H3K27me3 in *B. rapa* development, we characterized a tilling mutant line deficient in the H3K27 methyltransferase BraA.CLF. ChIP-seq data (225 million paired-end fragments) and 3'RNA-seq data (75 million single-end reads) were archived at NCBI Sequence Read Archive under the accession number PRJNA542357.

## Analyses

### A Reproducible Epigenomic Analysis pipeline

To enhance compliance with the FAIR principles (findability, accessibility, interoperability, and reusability) for scholarly digital objects [18], we designed a Reproducible Epigenomic Analysis (REA) pipeline for ChIP-seq and RNA-seq using Galaxy [19], an open web-based platform where each analytical step is formally documented and can be shared and reproduced. We generated Galaxy workflows for the analysis of both ChIP-seq data and RNA-seq data. These workflows were executed on a locally administered Galaxy server via a Docker container image [20]. The Docker technology allowed us to bundle all Galaxy components and tools into a distributable package, which is publicly available for download and execution. Analytical steps that could not be integrated within a Galaxy workflow were captured and documented in Jupyter notebooks [21], an open-source interactive computing environment that allows sharing of code, documentation, and results. These notebooks are also available within a Docker image that runs Jupyter. The REA pipeline is available in the GitHub repository [https://github.com/wilkinsonlab/epigenomics\\_pipeline](https://github.com/wilkinsonlab/epigenomics_pipeline) and in the associated Zenodo release (doi:10.5281/zenodo.3298028).

In Fig. 1, a schematic representation of our REA pipeline is shown. We used well-established tools including Bowtie2 [22] for short-read sequence alignment, HTSeq [23] for feature mapping quantification, epic2 [24] for ChIP-seq peak calling, MAnorm [25] for quantitative comparison of ChIP-seq data, and DESeq2 [26] for differential gene expression analysis. A detailed description of these workflows can be found in the Methods section.



## Genome-wide identification of H3K27me3 regions in *B. rapa*

To study the epigenetic landscape of histone H3K27 trimethylation in *B. rapa* we performed ChIP experiments from leaf samples. Immunoprecipitated chromatin and Input (chromatin extracts not subjected to immunoprecipitation) DNA libraries were sequenced by Illumina technology at 125 bp paired-end reads; more than 30 million fragments were obtained for each sample (Table S1) and sequencing data were analyzed using the REA pipeline. Raw paired-end reads were trimmed to remove low quality bases and short reads, with over 99% of ~123 bp-long reads being maintained. Two of the most commonly used aligners for ChIP-seq analysis are BWA [27] and Bowtie2, which carry out fast mapping of DNA sequences using the Burrows-Wheeler transform method. We tested which of these aligners best suited our samples using the latest *B. rapa* v3.0 Chiifu-401 genome as reference [14,17]. Although BWA yielded comparable results, we obtained a small increase on paired-end mapping efficiency using Bowtie2 (Table S2), and this algorithm was therefore used for the remainder of our genomic analyses in *B. rapa*. Mapping with Bowtie2 against *B. rapa* v3.0 genome [17] yielded an average 82% mapping rate, where 42-61% of the reads mapped to multiple locations, likely reflecting the mesopolyploid nature of the *B. rapa* genome or the abundance of repeated DNA elements. After mapping, duplicated reads were removed and ChIP-seq signal distribution over *B. rapa* genes was visualized and inspected using the Integrative Genomics Viewer (IGV) [28].

Then, we determined the overall distribution patterns of H3K27 methylation on *B. rapa* using the REA pipeline. A metagene plot of H3K27me3 ChIP-seq signal showed that, as described in other plant species, H3K27 methylation is not enriched at promoter regions but rather covers *B. rapa* coding regions, showing little preference for the 5' versus 3' ends of genes (Fig. 2A). A heat map representation of the genome-wide ChIP-seq signal showed that H3K27me3 accumulation displays a gradual variation between genes: with some genes showing high histone methylation density, and others relatively low H3K27me3 levels (Fig. 2B). To precisely determine the location of H3K27me3-marked regions across the genome, we performed a ChIP-seq peak calling analysis adjusting software settings for detection of broad range peaks. We compared two widely used but different peak-calling algorithms: MACS2 [29], an algorithm initially designed to identify sharp peaks but extended to detect broad peaks such as those arising from this analysis; and epic2, a highly performant implementation of SICER [30], an algorithm designed for noisy and diffuse ChIP-seq data such as histone methylation. Both peak finding algorithms detected a comparable number of peaks (MACS2 20,000 and epic2 15,000 peak regions). However epic2 was able to

detect wider histone methylated regions than MACS2 (Fig. S1), with a mean peak size of 2,991 bp for epic2 compared to 1,985 bp for MACS2, and was the preferred tool for studying diffuse epigenetic marks in our study.

Our REA pipeline identified 15,136 H3K27me3 marked regions in *B. rapa* leaves using epic2 (Tables S3 and S4), where 68% overlapped with one or more protein-coding genes (Fig. 2C and D, Table S3). We found 12,480 genes marked with H3K27me3, which represents 27% of all *B. rapa* protein-coding genes. In animals H3K27 methylated regions cover hundreds of kilobases and usually span several genes [6,7]. We found that the average size of *B. rapa* H3K27me3-marked regions was about 3 kb, and that 55% of these peak-regions were associated with single genes (Fig. 2C and D, Table S3). This is similar to what has been described for Arabidopsis [7]. However, consistent with the complexity of the *B. rapa* genome, we also found about 2,000 multigenic regions including some large H3K27 methylated regions spanning more than 10 kb (peak regions list is provided in Table S4). In summary, our analysis indicates that H3K27 methylation marks a great portion of the *B. rapa* genome but it is mainly associated with single genes.

### **H3K27me3 correlates with low transcript levels in *B. rapa***

To identify the correlation between H3K27me3 and gene expression, we performed 3'RNA-seq on the same leaf samples used for ChIP-seq. Profiling RNA levels by 3'RNA-seq and other tag-based methods usually gave higher dynamic detection range and improved mRNA quantification than full transcriptome sequencing [31]. Following the REA pipeline, quantitative mRNA data from *B. rapa* leaves was obtained (Table S5). After normalization of expression data, genes were sorted into four categories according to their mRNA levels and used to separately represent their average ChIP-seq H3K27me3 signal on a metagene plot. As shown in Fig. 3A, genes with high levels of H3K27me3 usually exhibit low or no expression, indicating that, as in most eukaryotes, H3K27 methylation in *B. rapa* is associated with gene silencing.

To select for genes potentially regulated by H3K27me3 in *B. rapa* leaves, we selected high quality peak regions where the ChIP signal determined by epic2 was larger than one-fold increase over the background ( $FC > 1$ ). This analysis identified 8,510 genes that were used as input to a Singular Enrichment Analysis (SEA) of Gene Ontology (GO) terms using agriGO [32]. The resulting GO term list was summarized and reduced in complexity using REVIGO [33]. The results in Fig. 3B show that, in *B. rapa*, H3K27me3-marked genes are enriched in biological process categories related

to metabolism (GO:0006807, GO:0019222, GO:0044237), cell differentiation (GO:0030154) and regulation of gene expression (GO:0010468). In addition, H3K27me3-marked genes were also enriched in response to stimulus (GO:0009991) and response to stress (GO:0006950) categories, suggesting that this epigenetic mark plays a role coordinating genomic responses to external cues. In several eukaryotic organisms, H3K27me3-mediated silencing is related to the transition between developmental programs [2,3]. Remarkably, we found that a significant number of genes repressed by H3K27me3 in *B. rapa* leaves were related to developmental processes (GO:0032502), and more specifically to flower development (GO:0009908) categories. These data suggest that H3K27 methylation contributes to the silencing of floral developmental genes in *B. rapa* leaves.

### **Dynamic changes in H3K27me3 are associated with the floral transition in *B. rapa***

The transition from vegetative to reproductive development is a crucial step in the plant-life cycle [34]. This process is highly regulated and involves a genome-wide transcriptional reprogramming where different developmental programs are activated or repressed [8,12]. To determine the role of H3K27me3 deposition in *B. rapa* floral transition, we performed H3K27me3 ChIP-seq and RNA-seq analysis on *B. rapa* inflorescences and analyzed the sequencing data using our REA pipeline (Tables S5 and S6). We identified 7,436 high-confidence epic2 peaks ( $FC > 1$ ) in *B. rapa* inflorescences that showed a great overlap with leaf peaks (Fig. S2). To compare H3K27 methylated genes between leaves and inflorescences, we selected the high-confidence peaks from these two organs and performed a quantitative ChIP-seq signal comparison using MAnorm. Setting a  $|M| > 0.5$  cut-off ( $M = \log_2$  fold-change of the normalized read densities from leaf vs inflorescences), we found 5,986 differentially H3K27me3-marked regions between leaves and inflorescences including 4,729 differentially marked genes (Fig. 4A and Table S7). Thus, about 55% of all 10,726 high-confidence peaks (merged data from both leaves and inflorescences, Fig. S2) showed a significant histone methylation change between these two plant organs.

H3K27 methylation changes are not always correlated with gene expression changes [2,6]; e.g., a reduction of H3K27me3 levels may not be enough to promote transcription in the absence of a specific transcription factor. To examine the extent to which the observed H3K27me3 differences in *B. rapa* were correlated with the gene expression changes required for the formation of flowers, differentially expressed

genes (DEG) between leaves and inflorescences were determined with our RNA-seq data analysis workflow. Using DESeq2 under our REA pipeline, we found 13,377 DEG (Tables S5 and Fig. 4B;  $|\log_2FC|>0.5$ ) between *B. rapa* leaves and inflorescences, indicating that about 29% of *B. rapa* protein-coding genes are differentially expressed between leaves, a vegetative tissue, and inflorescences, the reproductive organs of the plant. To study the correlation between differential H3K27me3 deposition and differential mRNA levels between leaves and inflorescences, we represented the differences in H3K27me3 signal (MAnorm M value) against the differential expression levels (DESeq2  $\log_2FC$ ) between leaves and inflorescences (Fig. 4C). This revealed 1,724 genes (4% of all gene models) that significantly changed in both their H3K27me3-mark and their mRNA levels. Of these, 729 loci showed higher H3K27me3 signal in leaves relative to flowers, as well as lower gene expression in leaves relative to flowers (Table S8). Interestingly, SEA analysis of this set of H3K27 regulated genes showed that the main GO enriched categories include terms related to processes involved in the development of the flower: floral whorl development (GO:0048438), floral organ development (GO:0048437) and flower development (GO:0009908) (Fig 4D). Very interestingly, this list was enriched in well-known *B. rapa* floral regulators like *B. rapa FT*-like genes [35] and more than 60 MADS-box genes. MADS-box proteins are conserved transcription factors that play an important role in the control of flowering time and reproductive development in plants [35]. The list of H3K27 regulated genes in Table S8 includes a number of *B. rapa* MADS-box genes with homology to floral homeotic genes like *AGAMOUS*, *APETALA1*, *CAULIFLOWER*, *PISTILLATA* and *SEPALLATA* genes, or involved in the floral transition like *AGL19*, *FRUITFUL* and *SOC1* [36]. All these data suggest that H3K27 methylation is important for the expression of floral regulatory genes and, eventually, the proper development of the reproductive structures in *B. rapa*.

### **H3K27me3 deposition is crucial for *B. rapa* development**

In *Arabidopsis*, there are three H3K27 methyltransferases: the main one is CURLY LEAF (CLF) [3,37], which is partially redundant with SWINGER [38], and MEDEA which is only expressed in the female gametophyte and seeds [39]. CLF mutations result in defective floral morphology, early flowering and severe leaf developmental alterations [37]; these developmental defects are due to misexpression of H3K27me3-silenced target genes [38,40].

In the *B. rapa* genome there is one CLF, one SWINGER, and two MEDEA-like homologs [41]. To determine the effect of impaired H3K27 deposition on the

development of *B. rapa*, we studied the function of *BraA.CLF* (*BraA04g017190.3C*). Consistent with a possible role as a general H3K27 methyltransferase across the plant, we found that *BraA.CLF* (*BraA04g017190.3C*) gene is expressed in *B. rapa* leaves and flowers (Fig. S3). We obtained a tilling mutant line [42], *braA.clf-1* (Gln615Stop), that produced a truncated protein without the catalytic domain. As shown in Fig. 5, *braA.clf-1* has a smaller overall size, reduced expansion of flowers, and curled sepals and petals (Fig. 5 and S4A). In addition, about 5% of flowers showed homeotic transformation of floral organs (Fig. S4B). However, the most striking phenotype of the mutant was the upward curled leaves that were most severe on younger leaves (Fig. 5 and S4A). All these developmental abnormalities are similar to the Arabidopsis *clf* mutant, suggesting a high degree of functional conservation between both species.

The upward curved leaves in Arabidopsis *clf* mutant are due to the upregulation of the floral identity gene *AGAMOUS* (*AG*), which is a direct CLF target in the leaf [37,43]. In our genomic analysis (Table S8), we found that the two *B. rapa* *AG* loci [44], *BraA01g010430.3C* (*BraA.AG.a*) and *BraA03g048590.3C* (*BraA.AG.b*), showed lower expression and higher H3K27 methylation in leaves than inflorescences. Thus, we wondered whether BraA.CLF may be repressing these two genes in *B. rapa* leaves. We performed ChIP experiments and found that H3K27me3 levels were reduced at *BraA.AG.a* and *BraA.AG.b* loci in mutant *braA.clf-1* leaves (Fig. 6A and B). This reduction in H3K27me3 was associated with increased *BraA.AG.a* and *BraA.AG.b* mRNA levels in *braA.clf-1* mutant leaves as determined by real-time quantitative reverse transcription polymerase chain reaction (RT-qPCR) (Fig. 6C). All these data indicate that BraA.CLF is a major histone methyltransferase regulating the deposition of H3K27me3 at key developmental genes in *B. rapa*; and, more importantly, that the correct H3K27 methylation is crucial for the optimal growth of Brassica crops.

## Discussion

In this work, we determined the genome-wide and organ-specific distribution of H3K27me3 together with the transcriptome dynamics in leaves and inflorescences of *B. rapa* R-o-18, an oilseed cultivar. We found that H3K27me3 is present in a large number of genomic locations across the *B. rapa* genome, mainly associated with protein-coding genes. Interestingly, SEA analyses showed that H3K27me3 marked genes are enriched in GO terms related to gene regulation, such as “regulation of gene expression” (GO:0010468). In parallel with our ChIP-seq experiments, to correlate histone modification levels with transcript levels, we performed mRNA quantification by

3'RNA-seq. As in other organisms, we found that H3K27me3 is anticorrelated with mRNA levels indicating that this epigenetic mark is also a hallmark for gene inactivation in *B. rapa*. All these data suggest that H3K27me3 plays an important role in the regulation of gene expression in *Brassica* crops.

Our analysis also revealed that a number of genes related to floral development were marked by H3K27me3 in *B. rapa* leaves. Floral development and the proper formation of the reproductive organs of the plant are crucial for the formation of fruits and seeds, and have a great impact on crop yield. To find out the role of H3K27 methylation on floral development in *B. rapa*, we performed a differential analysis of ChIP-seq and 3'RNA-seq signal in leaves vs inflorescences. We found that genes involved in the floral transition or floral organ identity are highly methylated and not expressed in leaves; whereas in inflorescences, the high mRNA levels of this group of genes was associated with a significant decrease of H3K27me3. These data indicate that the repressive H3K27me3 mark is playing a role to prevent ectopic expression of floral regulator genes outside reproductive tissues.

The trimethylation of histone H3 is performed by conserved Polycomb PRC2 complexes. In the model plant *Arabidopsis*, CLF is the main H3K27 methyltransferase. In this work, we isolated a tilling mutant line on the sole *B. rapa* CLF homolog. Phenotypic analysis showed that *braA.clf-1* mutant plants display several developmental defects like a characteristic curved leaf phenotype. Further ChIP and RT-qPCR experiments showed that *BraA.AG.a* and *BraA.AG.b*, the two *B. rapa* homologs of the floral identity gene *AG*, were upregulated due to reduced H3K27me3 in *braA.clf-1* mutant leaves. All these data suggest that BraA.CLF is a *bona fide* H3K27 methyltransferase and demonstrate the important role of this epigenetic mark for the correct development of *B. rapa* plants.

The *Brassica* genus contains a diverse collection of economically important crop species, including the third-highest produced oil crop in the world and constituting an increasingly popular source of nutrients due to their anticancer, antioxidant, anti-inflammatory properties and high nutritional value [15]. The *B. rapa* genome was the first sequenced Brassica crop [14], but in recent years the genome sequences of cabbage (*B. oleracea*), black mustard (*B. juncea*) and rapeseed (*B. napus*) have been released [45]. The comprehensive study of H3K27 methylation in *B. rapa* presented here opens the door to explore other *Brassica* crops with more complex genomes. We hope that the epigenomic datasets and bioinformatic analytical pipelines generated in this work will aid future studies to shed more light on the epigenetic regulation in plants.

## Potential implications

Here we presented novel H3K27me3 epigenomic and transcriptomic *B. rapa* datasets. To understand the molecular mechanisms of epigenetic regulation in plants is important as fundamental knowledge but has also enormous implications for crop improvement and agriculture [46]. DNA sequence variability alone cannot explain all the diversity of plant phenotypes [47]. The isolation of stable epigenetic variants of several crops has led to the idea that epigenetics could contribute to heritable natural variation that can be selected in plant breeding and crop improvement programs [46,47].

On the other hand, to analyze our data we designed a bioinformatic pipeline for ChIP-seq and RNA-seq, the Reproducible Epigenomic pipeline, and made this publicly available adhering to the FAIR data principles. The pipeline was constructed using a set of well-established genomic tools and approaches, using a combination of a Galaxy environment and Jupyter notebooks [21]. Both Galaxy and Jupyter provide analytics environments that can be reproduced by anyone through a user-friendly Web interface, and ensures transparency and reusability/reproducibility of our analyses and outcomes, as well as providing a platform for others to execute similar analyses following our approach.

## Methods

### Plant Material

*B. rapa* yellow sarson (*ssp. trilocularis*) R-o-18 wild-type (WT) and *braA.clf-1* (ji32391-a; Gln615Stop) mutant seeds were obtained from RevGenUK [42]. Plants were sown in 15 cm diameter plastic pots containing a mixture of substrate and vermiculite (3:1) with added controlled-release fertilizer (*Nutricote*, Projar Ltd.); and then grown in controlled-environment plant growth chambers with day/night temperatures of 21/19°C, a mix of cool-white and wide-spectrum FLUORA fluorescent lights (100  $\mu\text{E}/\text{m}^2\text{s}$ ) and 16 h of light followed by 8 h of darkness. Pictures of flowers were taken using a Leica MZ10 F Stereomicroscope.

### Chromatin Immunoprecipitation and DNA sequencing

ChIP experiments were performed using *B. rapa* R-o-18 wild-type primary leaves collected 14 days after germination (Fig. S5A), and inflorescences collected when the first flowers started to open (Fig. S5B and C). Sampling was performed at the end of the light period (zeitgeber time ZT16). Each biological replicate comprises samples from 6 independent plants. ChIP experiments were performed using 2 g of tissue as described at our Plant Chromatin Immunoprecipitation protocol V.2 [48]. We used a specific antibody against H3K27me3 (Millipore 07-449, Lot No. 2736613.). The oligonucleotide sequences used for the ChIP-qPCR amplification reactions can be found in Table S9.

ChIP-seq sequencing libraries were prepared using NEBNext Ultra DNA Library Prep kit (New England BioLabs 7370) starting from 4 ng of immunoprecipitated DNA. One inflorescence and two leaves ChIP-seq biological replicates were sequenced at 2x125 bp paired-end reads in an Illumina HiSeq 2500 platform using the SBS v4 kit (Illumina) at the Genomics Units of CNAG-CRG (Barcelona, Spain).

### **Gene expression profiling and 3'RNA sequencing**

Total RNA was extracted from the same plant tissues than ChIP using EZNA Plant RNA Kit (Omega Bio-tek) following the manufacturer's recommendations. Each biological replicate contained samples from 6 independent plants. Complementary DNA (cDNA) was prepared by reverse transcription of 1 µg of total RNA using "Maxima cDNA Kit with dsDNase" (Thermo Fisher Scientific) according to the manufacturer instructions, and quantification was performed by RT-qPCR using the LightCycler 480 and SYBR Green I Master mix (Roche). Gene expression was determined by  $2^{-\Delta\Delta CT}$  method using *BraA.TUBULIN* (*BraA10g026070.3C*) [49] as housekeeping gene. The oligonucleotide sequences used for qPCR primers can be found in Table S9.

Libraries for 3'RNA-seq were prepared using a MARS-seq protocol adapted for bulk RNA-seq [50,51] with minor modifications. Briefly, 100 ng of total RNA were reverse-transcribed using poly-dT oligos carrying a 7 bp-index. cDNAs were then pooled and subjected to linear amplification via *in vitro* transcription. The resulting amplified RNA was fragmented and dephosphorylated. Ligation of partial Illumina adaptor sequences [50] was followed by a second reverse-transcription and full Illumina adaptor sequences were added during a final library amplification. Libraries were quantified using a Qubit 3.0 Fluorometer (Life Technologies) and their size profiles examined in a TapeStation 4200 system (Agilent). Three biological replicates for each tissue were sequenced at 1x68 bp single-end reads in an Illumina NextSeq



500 (Illumina) at the Advanced Genomics Laboratory of the Centro de Investigación Médica Aplicada (CIMA; Pamplona, Spain).

### **The Reproducible Epigenomic Analysis pipeline**

Analysis of sequencing data was conducted within environments that either allow the assembly of bioinformatics tools into analytical workflows (Galaxy), or serve to share interactive code-containing documents (Jupyter Notebooks). Jupyter Lab's R and bash kernels were installed using Anaconda3 (Anaconda Software Distribution, 2018). The REA pipeline was implemented as a series of steps distributed within a Docker container (<https://hub.docker.com/>) which includes all required software dependencies. Any user can deploy a REA instance on-demand. To be able to download and use a dockerized version of Galaxy (<https://github.com/bgruening/docker-galaxy-stable>), Docker version 18.09.3 was first installed following the documentation on Docker-CE for Ubuntu. Next, Galaxy version 18.05 was locally installed with the commands:

```
mkdir -p ~/DockerFolders/galaxy_v1
docker run -d -p 8080:80 \
-v ~/DockerFolders/galaxy_v1:/export/ \
quay.io/bgruening/galaxy:18.05
```

This local Galaxy server can be accessed and administered on <http://localhost:8080/>. Most tools were installed from the Galaxy Tool Shed, with the exception of epic2 v0.0.14 (<https://github.com/biocore-ntnu/epic2>), which we manually installed inside the docker container via an interactive session using python pip and wrapped as a Galaxy tool. Our wrapped epic2 tool has been successfully integrated into Galaxy and published into the Galaxy Tool Shed ([www.galaxyproject.org](http://www.galaxyproject.org)). Versions and settings of tools used in Galaxy are noted in the workflows published in our DockerHub images, as well as described below.

To facilitate reproducibility of our data analyses, we built and published two Docker images, which contained all dependencies and software requirements to create a ready-to-run analytical workflow (see Availability of Supporting Data). The first image contains a Galaxy instance with required tools installed and accessory files to download/index the *B. rapa* reference genome and prepare/run workflows with the analytical steps described below. These workflows are designed to download raw sequencing reads from SRA and export the results locally for further processing. The

second image, which runs Jupyter Lab, includes software installations and notebooks with instructions to finalize data analysis and explore results; they include, as a default view, the results published here. These images are designed to operate on a shared local directory for Jupyter to access Galaxy results. Detailed instructions on how to deploy and run each container can be found in our GitHub repository README file.

To enhance our compliance with FAIR publishing requirements, metadata files following schema.org format for both the ChIP-Seq and RNA-Seq experiments are available in the GitHub. In addition, metadata descriptors for the ChIP-seq and RNA-seq data submissions in the NCBI SRA are available in ISA-Tab format in the same GitHub repository. All of these files are also available in the associated Zenodo snapshot release (doi:10.5281/zenodo.3298028).

### **ChIP-seq analysis**

Sequencing data was uploaded to a local Galaxy instance in fastqsanger format. Each sample was independently processed and replicates pooled for peak calling. A first step of trimming was performed with [52] v0.36.5. Trimmed reads were mapped to the *B. rapa Chiifu* v3.0 genome using Bowtie2 v2.3.4.2 or BWA v0.7.17.3, and the results were compared with SAMtools Flagstat [53]. Bowtie2 aligned reads were used in subsequent analyses. BAM files were filtered with SAMtools v1.8 by mapping quality (including concordance of mates) and by duplication state (possible duplicate reads that may arise during library preparation), marked by Picard MarkDuplicates v2.18.2.0 [54]. The set of deduplicated reads was used for ChIP-seq peak calling on pooled replicates using epic2 v0.0.14 or MACS2 v2.1.1 for comparison to one another; the epic2 output was then used for downstream processes. Additional steps on the workflow are aimed at collecting quality metrics on MultiQC [55], as well as producing bigwig files using DeepTools 3.1.2 [56] with the coverage of filtered alignments on bin sizes of 50 bp.

Results from data analysis on Galaxy were downloaded locally for further processing and visualization. The *B. rapa* genome v3.0 contains 10 chromosomes but also thousands of smaller scaffolds, with sequences from either nuclear chromosomes or chloroplast/mitochondria organelles. Thus, prior to differential analysis of H3K27 methylation between different leaves and inflorescences, raw peak calling results from epic2 were curated via selection of nuclear regions and visual inspection on IGV viewer. Then, H3K27me3 mark intensities, from pooled quality-filtered aligned reads (keeping duplicates), over peaks were compared on leaves vs inflorescences with

MAnorm v1.2.0. Finally, the annotation of peaks overlapping *B. rapa* gene models was done with ChIPpeakAnno [57], and the distribution of ChIP signal over genes was visualized with ngs.plot [58].

### **RNA-seq analysis**

The bulk transcriptomic analysis was performed using a specific RNA-seq analysis workflow on a local Galaxy instance. Single-end reads were trimmed with Trimmomatic and mapped with Bowtie2 against *B. rapa* v3.0 genome. Before counting, available *B. rapa* v3.0 gene models, which only comprise the coding sequences, were extended by 300 bp at each gene's 3' UTR regions and used to quantify aligned reads using HTSeq-count script with stranded and intersection of non-empty sets options. The obtained counts were used for mRNA differential expression analysis with DESeq2 1.18.1 between leaves and inflorescences. Expression results were downloaded locally for further analysis outside Galaxy in combination with annotated peaks. Categorization of genes by expression level was achieved after transformation of count data into z-scores as follows: for each expressed gene and tissue, normalized counts were averaged across replicates, subtracted the dataset average and divided by dataset standard deviation. These z-scores were used to define genes with low ( $z < -0.5$ ), medium ( $-0.5 < z < 0.5$ ), and high expression ( $z > 0.5$ ).

### **Other Bioinformatic analyses**

Gene Ontology analysis was performed using agriGO v2.0 (Fisher statistical test method; Yekutieli Multi\_test adjustment method;  $p < 0.05$ ; and Plant GO slim ontology type); data was visualized reduced in complexity and redundant GO terms using REVIGO with default parameters (allowed similarity = 0.7; semantic similarity measure = SimRel).

Functional annotation of *B. rapa* v3.0 gene models was obtained from [17]. Custom annotation of gene models from *B. rapa* genome v3.0 was obtained blasting coding sequences against *B. rapa* genome v1.5 (E-value cutoff of 0.001) and Arabidopsis (TAIR10 proteins, blastx of *B. rapa* coding sequences with an E-value cutoff of  $1e-25$ ).

During our analyses of H3K27me3 levels on *B. rapa* AGAMOUS genes, we found that *BraA.AG.a* (*BraA01g010430.3C*) gene structure annotation was not correct in the recent *B. rapa* genome v3.0. We curated *BraA.AG.a* gene structure using

AUGUSTUS [59] and Bra013364 (*B. rapa* genome V1.5) gene information at *B. rapa* database [45].

### **Availability of supporting data**

ChIP-seq and RNA-seq data sets supporting the results of this article are available at NCBI Sequence Read Archive under the accession number PRJNA542357. Review link: <https://dataview.ncbi.nlm.nih.gov/object/PRJNA542357?reviewer=rkg5k1p4qlefgqc45c29fomo5f>

Latest versions of the components of the REA pipeline, and instructions to deploy the Galaxy/Jupyter containers and run the analysis can be found in the GitHub repository [https://github.com/wilkinsonlab/epigenomics\\_pipeline](https://github.com/wilkinsonlab/epigenomics_pipeline); this is associated with a Zenodo release (doi:10.5281/zenodo.3298028) to match the configuration used in this publication.

Compiled docker images are available at <https://hub.docker.com/u/mpaya>.

### **Additional files**

Additional file 1 Figure S1: Differences between epic2 and MACS2 peak calling algorithms.

Additional file 1 Figure S2: H3K27me3 peaks overlap between leaves and inflorescences.

Additional file 1 Figure S3: Transcript levels of *B. rapa* H3K27 methyltransferase encoding-genes.

Additional file 1 Figure S4: *BraA.clf-1* mutant phenotypes.

Additional file 1 Figure S5: Pictures of *B. rapa* plant sampling materials.

Additional file 2 Table S1. Alignment statistics.

Additional file 2 Table S2. Comparison of Bowtie2 and BWA performance.

Additional file 2 Table S3. H3K27 trimethylated regions identified in *B. rapa* leaves.

Additional file 3 Table S4. List of H3K27me3 peaks in *B. rapa* leaves.

Additional file 3 Table S5. 3'RNA-seq results.

Additional file 3 Table S6. List of H3K27me3 peaks in *B. rapa* inflorescences.

Additional file 3 Table S7. List of H3K27me3 differentially marked regions.

Additional file 3 Table S8. H3K27me3 regulated genes.

Additional file 4 Table S9. Primer list.

## **Declarations**

The authors declare that they have no competing interests.

## **Abbreviations**

3'RNA-seq: 3'-end RNA sequencing

AG: AGMOUS

ChIP: chromatin immunoprecipitation

CLF: CURLY LEAF

cDNA: complementary DNA

DAG: days after germination

DEG: differentially expressed genes

FAIR: findability, accessibility, interoperability, and reusability

H3K27me3: histone H3 lysine 27 trimethylation

IGV: integrative genomics viewer

Kb: Kilobase

log<sub>2</sub>FC: the base 2 logarithm of the fold-change

mRNA: messenger RNA

PRC2: Polycomb repressive complex 2

qPCR: real-time quantitative polymerase chain reaction

REA: reproducible epigenomic analysis

RT-qPCR: real-time quantitative reverse transcription polymerase chain reaction

SEA: singular enrichment analysis

s.d: standard deviation

### **Competing interests**

The authors declare that they have no competing interests.

### **Funding**

This work was supported by grant BIO2015-68031-R and grant RYC-2013-14689 to PC, and BES-2016-078939 fellowship to LP from the Spanish Ministerio de Economía y Competitividad (MINECO/FEDER, EU). The CBGP is supported by grant SEV-2016-0672 (2017-2021) from the "Severo Ochoa Programme for Centres of Excellence in R&D" (Agencia Estatal de Investigación of Spain). In the frame of this program, MPM was supported with a postdoctoral contract.

### **Author Contributions**

PC conceived the work; MPM performed computational biology analyses; LPV performed initial bioinformatic analysis and experimental research. PSMU and DLA performed 3'RNA-seq library preparation and sequencing. MW contributed with analytical tools and metadata generation. PC and MPM wrote the first draft of the manuscript that was completed with the assistance of LPV and MW. All authors approved the final version of the article.

### **Acknowledgements**

We are grateful to Jose A. Jarillo (CBGP, Madrid), Manuel Piñeiro (CBGP, Madrid) and Martín Trick (John Innes Centre, UK) for their help along this project. We thank Laura Castro (CIMA, Spain) for RNA-seq data processing. The authors thank the CNAG-CRG (Barcelona, Spain) for assistance with CHIP-seq experiments. We thank Xiaowu Wag (Institute of Vegetables and Flowers, China) for *B. rapa* gene ontology annotations and Abdul Baten and Graham King for sharing information about *B. rapa* R-o-18 genome.

### **FIGURE LEGENDS**

**Figure 1: Schematic view of the analytical workflow of the Reproducible Epigenomic Analysis pipeline (REA).** A) Samples from leaves and inflorescences were used for CHIP-seq and RNA-seq data collection. B) Major analytical steps were

conducted in a reproducible Galaxy workflow, running on a Docker container. C) Further analysis and graphical representation of results were tracked and run on Jupyter interactive notebooks.

**Figure 2: ChIP-seq analysis of H3K27me3 regions in *B. rapa* leaves.** A) Metagene plot of ChIP-seq signal over marked genes. B) Gene heat map of H3K27me3 marked genes, ordered by ChIP-seq signal density. C and D) Distribution of H3K27me3 peak regions by length (C) and number of covered genes (D).

**Figure 3: Influence of H3K27 methylation on gene function.** A) Metagene plot of H3K27me3 ChIP-seq signal in genes categorized by gene expression level in *B. rapa* leaves. B) Semantic clustering of enriched GO terms of H3K27me3 marked genes in *B. rapa* leaves. SEA analysis performed with agriGO (default background = TAIR10\_2017 genome locus) and scattered plot generated with REVIGO tool. Biological process terms from GO are positioned in a two dimensional space derived by multidimensional scaling to a matrix of the semantic similarities of GO terms. The size of the bubble indicates the frequency of the GO term in the underlying Arabidopsis TAIR10 gene ontology and *p-values* are indicated by a color scale.

**Figure 4: Differential accumulation of H3K27 methylation between *B. rapa* leaves and inflorescences.** A) MA plot showing the differential accumulation of H3K27me3 on ChIP-seq peaks determined with MANorm; significance indicated with color scale - red indicates  $-\log_{10}(p\text{-value}) > 50$ . B) MA plot showing the DEG between leaves and inflorescences determined with DESeq2; significant DEG ( $p_{\text{adj}} < 0.1$ ) are colored red. C) Distribution of H3K27me3 marked regions in leaves by differential levels of H3K27me3 and mRNA ( $p_{\text{adj}} < 0.1$ ) on leaves versus inflorescences. Dots were colored accordingly to their mRNA level category (high, medium, low and no expression) in inflorescences. D) Top enriched GO terms determined by SEA using agriGO (custom background = full list of DEG leaves vs inflorescences) in the subset of H3K27 regulated genes with lower ChIP-seq density ( $M > 0$ ) and higher gene expression ( $FC < 0$ ) in leaves compared to inflorescences.

**Figure 5: Characterization of *braA.clf-1* mutant.** A) Pictures of *B. rapa* R-o-18 wild-type: 25 days after germination plant (left, bar scale 5 cm), plant at flowering stage

(center, bar scale 5 cm) and a flower (right, bar scale 1 mm). B) Pictures of mature *braA.clf-1*: 25 days after germination plant (left, bar scale 5 cm), plant at flowering stage (center, bar scale 5 cm) and a flower (right, bar scale 1 mm). The *braA.clf-1* mutant shows smaller and curly leaves, and not well expanded flowers and curled sepals and petals.

**Figure 6: BraA.CLF repress *BraA.AG.a* and *BraA.AG.b* expression in leaves.** A) Cartoon depicting a representation of *BraA.AG.a* and *BraA.AG.b* locus and the chromatin regions analyzed by ChIP-qPCR. B) ChIP-qPCR showing the H3K27me3 levels at AG-like genes in *B. rapa* wild-type vs *braA.clf-1* mutant. Histone modification levels determined by quantitative qPCR amplification, data represent the average of two biological replicates; error bars indicate *s.d.* ChIP enrichments were quantified as %INPUT normalized to total DNA content determined by QUBIT assay. As negative control H3K27me3 levels at active housekeeping *TUBULIN* gene (*BraA10g026070.3C*) are shown in the figure. C) RT-qPCR data expression levels of AG-like genes in *B. rapa* wild-type vs *braA.clf-1* mutant. Data represent the average of three biological RNA replicates; error bars indicate *s.d.*

### Additional files

**Additional file 1 Figure S1: Differences between epic2 and MACS2 peak calling algorithms.** ChIP-seq signal of two representative *B. rapa* chromosomal regions are displayed using IGV viewer. As shown in the figure, both peak calling algorithms resulted in similar results but in some cases MACS2 calls multiple peaks at regions where epic2 calls broader peak regions.

**Additional file 1 Figure S2: H3K27me3 peaks overlap between leaves and inflorescences.** Venn diagram showing the overlap of high-confident H3K27me3 peaks determined by epic2 (FC>1) between leaves and inflorescences.

**Additional file 1 Figure S3: Transcript levels of *B. rapa* H3K27 methyltransferase encoding-genes.** Graphical representation of the data (normalized counts) from our 3'RNA-seq experiments from leaves and inflorescences.



**Additional file 1 Figure S4: *BraA.clf-1* mutant phenotypes.** A) Pictures of *B. rapa* R-0-18 wild-type (top) and *braA.clf-1* (bottom) plants 12, 15 and 18 days after germination (DAG). B) Homeotic changes during flower development in *braA.clf-1* plants. The arrow shows a sepal and petal mixture found in 1 out of 20 flowers analyzed.

**Additional file 1 Figure S5: Pictures of *B. rapa* plant sampling materials.** Plants 14 days after germination (A) and inflorescences at collection time (B).

**Additional file 2 Table S1. Alignment statistics.** Summary table indicating, for each ChIP-seq and RNA-seq sample, the number of total reads sequenced before and after quality trimming, and different mapping statistics using Bowtie2.

**Additional file 2 Table S2. Comparison of Bowtie2 and BWA performance.** Mapping statistics of Bowtie2 and BWA alignment of leaves samples.

**Additional file 2 Table S3. H3K27 trimethylated regions identified in *B. rapa* leaves.** A) General statistics of H3K27me3 peaks. B) Annotation of peaks that overlap with gene models.

**Additional file 3 Table S4. List of H3K27me3 peaks in *B. rapa* leaves.** InsideFeature column: *overlapStart*, peak on 5' region of gene; *overlapEnd*, peak on 3' end of gene; *inside*, peak located within gene; *includeFeature*, gene is located within peak.

**Additional file 3 Table S5. 3'RNA-seq results.** Differential expression was calculated on leaves vs inflorescences using DESeq2. Mean counts and standard deviation correspond to three biological replicates; expression level categories were determined from z-score transformations (see Methods); log2FC, padj and direction of change indicate differential expression results.

**Additional file 3 Table S6. List of H3K27me3 peaks in *B. rapa* inflorescences.** InsideFeature column: *overlapStart*, peak on 5' region of gene; *overlapEnd*, peak on 3'

end of gene; *inside*, peak located within gene; *includeFeature*, gene is located within peak.

**Additional file 3 Table S7. List of H3K27me3 differentially marked regions.**

Differentially marked peaks were identified with MAnorm. *M\_value*, log<sub>2</sub>FC of normalized read densities; *A\_value*, average signal strength; *Peak\_Group*, origin of peaks (one tissue or common).

**Additional file 3 Table S8. H3K27me3 regulated genes.** List of genes that show reduced H3K27 methylation (MAnorm M>0.5) and higher expression (log<sub>2</sub>FC < 0.5) in inflorescences than leaves.

**Additional file 4 Table S9. Primer list.**

## References

1. Grealia JM. A user's guide to the ambiguous word "epigenetics." Nat Rev Mol Cell Biol [Internet]. Nature Publishing Group; 2018;19:207–8. Available from: <http://www.nature.com/doi/10.1038/nrm.2017.135>
2. Sawarkar R, Paro R. Interpretation of developmental signaling at chromatin: the Polycomb perspective. Dev Cell [Internet]. Elsevier Inc.; 2010 [cited 2012 Nov 1];19:651–61. Available from: <http://www.ncbi.nlm.nih.gov/pubmed/21074716>
3. Xiao J, Wagner D. Polycomb repression in the regulation of growth and development in Arabidopsis. Curr Opin Plant Biol [Internet]. Elsevier Ltd; 2014 [cited 2015 Jan 5];23:15–24. Available from: <http://linkinghub.elsevier.com/retrieve/pii/S136952661400137X>
4. Schatlowski N, Creasey K, Goodrich J, Schubert D. Keeping plants in shape: polycomb-group genes and histone methylation. Semin Cell Dev Biol [Internet]. 2008 [cited 2012 Nov 29];19:547–53. Available from: <http://www.ncbi.nlm.nih.gov/pubmed/18718547>
5. Margueron R, Reinberg D. The Polycomb complex PRC2 and its mark in life. Nature [Internet]. 2011 [cited 2012 Jul 17];469:343–9. Available from: <http://www.ncbi.nlm.nih.gov/pubmed/21248841>
6. Grossniklaus U, Paro R. Transcriptional Silencing by Polycomb-Group Proteins.

- Cold Spring Harb Perspect Biol [Internet]. 2014;6:a019331–a019331. Available from: <http://cshperspectives.cshlp.org/lookup/doi/10.1101/cshperspect.a019331>
7. Zhang X, Clarenz O, Cokus S, Bernatavichute Y V., Pellegrini M, Goodrich J, et al. Whole-genome analysis of histone H3 lysine 27 trimethylation in Arabidopsis. PLoS Biol [Internet]. 2007 [cited 2012 Nov 1];5:e129. Available from: <http://www.pubmedcentral.nih.gov/articlerender.fcgi?artid=1852588&tool=pmcentrez&endertype=abstract>
  8. Lafos M, Kroll P, Hohenstatt ML, Thorpe FL, Clarenz O, Schubert D. Dynamic regulation of H3K27 trimethylation during Arabidopsis differentiation. PLoS Genet [Internet]. 2011 [cited 2012 Jul 19];7:e1002040. Available from: <http://www.ncbi.nlm.nih.gov/pubmed/21490956>
  9. He G, Zhu X, Elling A a, Chen L, Wang X, Guo L, et al. Global epigenetic and transcriptional trends among two rice subspecies and their reciprocal hybrids. Plant Cell. 2010;22:17–33.
  10. Makarevitch I, Eichten SR, Briskine R, Waters AJ, Danilevskaya ON, Meeley RB, et al. Genomic distribution of maize facultative heterochromatin marked by trimethylation of H3K27. Plant Cell [Internet]. 2013;25:780–93. Available from: <http://www.pubmedcentral.nih.gov/articlerender.fcgi?artid=3634688&tool=pmcentrez&endertype=abstract>
  11. Huan Q, Mao Z, Chong K, Zhang J. Global analysis of H3K4me3/H3K27me3 in Brachypodium distachyon reveals VRN3 as critical epigenetic regulation point in vernalization and provides insights into epigenetic memory. New Phytol [Internet]. 2018;1. Available from: <http://doi.wiley.com/10.1111/nph.15288>
  12. You Y, Sawikowska A, Neumann M, Posé D, Capovilla G, Langenecker T, et al. Temporal dynamics of gene expression and histone marks at the Arabidopsis shoot meristem during flowering. Nat Commun [Internet]. 2017;8:15120. Available from: <http://www.nature.com/doi/10.1038/ncomms15120>
  13. Lysak MA, Koch MA, Pecinka A, Schubert I. Chromosome triplication found across the tribe Brassiceae. Genome Res. 2005;15:516–25.
  14. Wang X, Wang H, Wang J, Sun R, Wu J, Liu S, et al. The genome of the mesopolyploid crop species Brassica rapa. Nat Genet [Internet]. 2011;43:1035–9. Available from: <http://www.nature.com/doi/10.1038/ng.919>
  15. Sadowski J. Genetics, Genomics and Breeding of Vegetable Brassicas [Internet]. Sadowski J, Kole C, editors. Genet. Genomics Breed. Veg. Brassicas. CRC Press; 2011. Available from: [http://www.journals.cambridge.org/abstract\\_S0014479711000974](http://www.journals.cambridge.org/abstract_S0014479711000974)
  16. Cheng F, Sun R, Hou X, Zheng H, Zhang F, Zhang Y, et al. Subgenome parallel

- selection is associated with morphotype diversification and convergent crop domestication in *Brassica rapa* and *Brassica oleracea*. *Nat Genet* [Internet]. 2016;1–10. Available from: <http://dx.doi.org/10.1038/ng.3634>
17. Zhang L, Cai X, Wu J, Liu M, Grob S, Cheng F, et al. Improved *Brassica rapa* reference genome by single-molecule sequencing and chromosome conformation capture technologies. *Hortic Res* [Internet]. 2018;5:50. Available from: <http://www.nature.com/articles/s41438-018-0071-9>
18. Wilkinson MD, Dumontier M, Aalbersberg IJ, Appleton G, Axton M, Baak A, et al. The FAIR Guiding Principles for scientific data management and stewardship. *Sci Data* [Internet]. 2016;3:160018. Available from: <http://www.nature.com/articles/sdata201618>
19. Afgan E, Baker D, Batut B, van den Beek M, Bouvier D, Čech M, et al. The Galaxy platform for accessible, reproducible and collaborative biomedical analyses: 2018 update. *Nucleic Acids Res* [Internet]. 2018;46:W537–44. Available from: <https://academic.oup.com/nar/article/46/W1/W537/5001157>
20. Maerkel D. Docker: Lightweight Linux Containers for Consistent Development and Deployment [Internet]. *LINUX J*. 2014. Available from: <https://www.linuxjournal.com/content/docker-lightweight-linux-containers-consistent-development-and-deployment>
21. Grüning BA, Rasche E, Rebolledo-Jaramillo B, Eberhard C, Houwaart T, Chilton J, et al. Jupyter and Galaxy: Easing entry barriers into complex data analyses for biomedical researchers. Ouellette F, editor. *PLOS Comput Biol* [Internet]. 2017;13:e1005425. Available from: <http://dx.plos.org/10.1371/journal.pcbi.1005425>
22. Langmead B, Salzberg SL. Fast gapped-read alignment with Bowtie 2. *Nat Methods* [Internet]. 2012;9:357–9. Available from: <http://www.nature.com/articles/nmeth.1923>
23. Anders S, Pyl PT, Huber W. HTSeq-A Python framework to work with high-throughput sequencing data. *Bioinformatics*. 2015;31:166–9.
24. Stovner EB, Sætrom P. epic2 efficiently finds diffuse domains in ChIP-seq data. Hancock J, editor. *Bioinformatics* [Internet]. 2019;3–4. Available from: <https://academic.oup.com/bioinformatics/advance-article/doi/10.1093/bioinformatics/btz232/5421513>
25. Shao Z, Zhang Y, Yuan G-C, Orkin SH, Waxman DJ. MAnorm: a robust model for quantitative comparison of ChIP-Seq data sets. *Genome Biol* [Internet]. 2012;13:R16. Available from: <http://genomebiology.com/2011/13/3/R16>
26. Love MI, Huber W, Anders S. Moderated estimation of fold change and dispersion for RNA-seq data with DESeq2. *Genome Biol* [Internet]. 2014;15:550. Available from: <http://genomebiology.biomedcentral.com/articles/10.1186/s13059-014-0550-8>

27. Li H, Durbin R. Fast and accurate short read alignment with Burrows-Wheeler transform. *Bioinformatics* [Internet]. 2009;25:1754–60. Available from: <http://www.ncbi.nlm.nih.gov/pubmed/19451168>
28. Thorvaldsdottir H, Robinson JT, Mesirov JP. Integrative Genomics Viewer (IGV): high-performance genomics data visualization and exploration. *Brief Bioinform* [Internet]. 2013;14:178–92. Available from: <https://academic.oup.com/bib/article-lookup/doi/10.1093/bib/bbs017>
29. Zhang Y, Liu T, Meyer CA, Eeckhoute J, Johnson DS, Bernstein BE, et al. Model-based Analysis of ChIP-Seq (MACS). *Genome Biol* [Internet]. 2008;9:R137. Available from: <http://genomebiology.biomedcentral.com/articles/10.1186/gb-2008-9-9-r137>
30. Zang C, Schonnes DE, Zeng C, Cui K, Zhao K, Peng W. A clustering approach for identification of enriched domains from histone modification ChIP-Seq data. *Bioinformatics*. 2009;25:1952–8.
31. Hrdlickova R, Toloue M, Tian B. RNA-Seq methods for transcriptome analysis. *Wiley Interdiscip Rev RNA*. 2017;8.
32. Du Z, Zhou X, Ling Y, Zhang Z, Su Z. agriGO: A GO analysis toolkit for the agricultural community. *Nucleic Acids Res*. 2010;38:64–70.
33. Supek F, Bošnjak M, Škunca N, Šmuc T. Revigo summarizes and visualizes long lists of gene ontology terms. *PLoS One*. 2011;6.
34. Blümel M, Dally N, Jung C. Flowering time regulation in crops — what did we learn from *Arabidopsis*? *Curr Opin Biotechnol* [Internet]. 2015;32:121–9. Available from: <https://doi.org/10.1016/j.copbio.2014.11.023>
35. Del Olmo I, Poza-Viejo L, Piñeiro M, Jarillo JA, Crevillén P. High ambient temperature leads to reduced FT expression and delayed flowering in *Brassica rapa* via a mechanism associated with H2A.Z dynamics. *Plant J* [Internet]. 2019;0–3. Available from: <http://doi.wiley.com/10.1111/tpj.14446>
36. Theißen G, Rümpler F, Gramzow L. Array of MADS-Box Genes: Facilitator for Rapid Adaptation? *Trends Plant Sci*. 2018;23:563–76.
37. Goodrich J, Puangsomlee P, Martin M, Long D, Meyerowitz EM, Coupland G. A Polycomb-group gene regulates homeotic gene expression in *Arabidopsis*. *Nature* [Internet]. 1997;386:44–51. Available from: <http://www.nature.com/articles/386044a0>
38. Chanvivattana Y, Bishopp A, Schubert D, Stock C, Moon Y-H, Sung ZR, et al. Interaction of Polycomb-group proteins controlling flowering in *Arabidopsis*. *Development* [Internet]. 2004 [cited 2010 Aug 21];131:5263–76. Available from: <http://www.ncbi.nlm.nih.gov/pubmed/15456723>
39. Köhler C, Page DR, Gagliardini V, Grossniklaus U. The *Arabidopsis thaliana* MEDEA Polycomb group protein controls expression of PHERES1 by parental

- imprinting. *Nat Genet* [Internet]. 2005 [cited 2010 Aug 6];37:28–30. Available from: <http://www.ncbi.nlm.nih.gov/pubmed/15619622>
40. Schubert D, Primavesi L, Bishopp A, Roberts G, Doonan J, Jenuwein T, et al. Silencing by plant Polycomb-group genes requires dispersed trimethylation of histone H3 at lysine 27. *EMBO J* [Internet]. 2006;25:4638–49. Available from: <http://emboj.embopress.org/cgi/doi/10.1038/sj.emboj.7601311>
41. Huang Y, Liu C, Shen WH, Ruan Y. Phylogenetic analysis and classification of the *Brassica rapa* SET-domain protein family. *BMC Plant Biol*. 2011;11.
42. Stephenson P, Baker D, Girin T, Perez A, Amoah S, King GJ, et al. A rich TILLING resource for studying gene function in *Brassica rapa*. *BMC Plant Biol* [Internet]. 2010;10:62. Available from: <https://doi.org/10.1186/1471-2229-10-62>
43. Serrano-Cartagena J, Candela H, Robles P, Ponce MR, Perez-Perez JM, Piqueras P, et al. Genetic analysis of incurvata mutants reveals three independent genetic operations at work in *Arabidopsis* leaf morphogenesis. *Genetics*. 2000;156:1363–77.
44. Saha G, Park J-I, Jung H-J, Ahmed NU, Kayum MA, Chung M-Y, et al. Genome-wide identification and characterization of MADS-box family genes related to organ development and stress resistance in *Brassica rapa*. *BMC Genomics* [Internet]. 2015;16:178. Available from: <http://www.biomedcentral.com/1471-2164/16/178>
45. Cheng F, Liu S, Wu J, Fang L, Sun S, Liu B, et al. BRAD, the genetics and genomics database for *Brassica* plants. *BMC Plant Biol* [Internet]. 2011;11:136–41. Available from: <http://bmcpplantbiol.biomedcentral.com/articles/10.1186/1471-2229-11-136>
46. Springer NM. Epigenetics and crop improvement. *Trends Genet* [Internet]. Elsevier Ltd; 2012 [cited 2013 Mar 18];29:241–7. Available from: <http://dx.doi.org/10.1016/j.tig.2012.10.009>
47. Gallusci P, Dai C, Génard M, Gauffretau A, Leblanc-Fournier N, Richard-Molard C, et al. Epigenetics for Plant Improvement: Current Knowledge and Modeling Avenues. *Trends Plant Sci* [Internet]. Elsevier Ltd; 2017;22:610–23. Available from: <http://www.sciencedirect.com/science/article/pii/S1360138517300894>
48. Poza-Viejo L, Del Olmo I, Crevillén P. Plant Chromatin Immunoprecipitation V.2 [Internet]. protocols.io. 2019. Available from: <https://www.protocols.io/view/plant-chromatin-immunoprecipitation-444gyyw>
49. Xu X, Yang Z, Sun X, Zhang L, Fang Z. Selection of reference genes for quantitative real-time PCR during flower bud development in CMS7311 of heading Chinese cabbage (*Brassica rapa* L. ssp. *pekinensis*). *Acta Physiol Plant* [Internet]. 2014;36:809–14. Available from: <http://link.springer.com/10.1007/s11738-013-1437-0>
50. Jaitin D. Massively parallel single-cell RNA-seq for marker-free decomposition of

tissues into cell types. *Science* (80- ). 2014;

51. Meinhof K, Leader A, Kobayashi S, Remark R, Rytlewski JA, Beasley MB, et al. Innate Immune Landscape in Early Lung Adenocarcinoma by Paired Single-Cell Analyses. *Cell*. 2017;169:750-765.e17.

52. Bolger AM, Lohse M, Usadel B. Trimmomatic: a flexible trimmer for Illumina sequence data. *Bioinformatics* [Internet]. 2014;30:2114–20. Available from: <https://academic.oup.com/bioinformatics/article-lookup/doi/10.1093/bioinformatics/btu170>

53. Li H, Handsaker B, Wysoker A, Fennell T, Ruan J, Homer N, et al. The Sequence Alignment/Map format and SAMtools. *Bioinformatics* [Internet]. 2009;25:2078–9. Available from: <https://academic.oup.com/bioinformatics/article-lookup/doi/10.1093/bioinformatics/btp352>

54. Picard tools [Internet]. Broad Institute, GitHub Repos. 2018. Available from: <https://github.com/broadinstitute/picard>

55. Ewels P, Magnusson M, Lundin S, Källér M. MultiQC: summarize analysis results for multiple tools and samples in a single report. *Bioinformatics* [Internet]. 2016;32:3047–8. Available from: <https://academic.oup.com/bioinformatics/article-lookup/doi/10.1093/bioinformatics/btw354>

56. Ramírez F, Ryan DP, Grüning B, Bhardwaj V, Kilpert F, Richter AS, et al. deepTools2: a next generation web server for deep-sequencing data analysis. *Nucleic Acids Res* [Internet]. 2016;44:W160–5. Available from: <https://academic.oup.com/nar/article-lookup/doi/10.1093/nar/gkw257>

57. Zhu LJ, Gazin C, Lawson ND, Pagès H, Lin SM, Lapointe DS, et al. ChIPpeakAnno: a Bioconductor package to annotate ChIP-seq and ChIP-chip data. *BMC Bioinformatics* [Internet]. 2010;11:237. Available from: <https://bmcbioinformatics.biomedcentral.com/articles/10.1186/1471-2105-11-237>

58. Shen L, Shao N, Liu X, Nestler E. ngs.plot: Quick mining and visualization of next-generation sequencing data by integrating genomic databases. *BMC Genomics* [Internet]. 2014;15:284. Available from: <http://bmcbioinformatics.biomedcentral.com/articles/10.1186/1471-2164-15-284>

59. Stanke M, Schöffmann O, Morgenstern B, Waack S. Gene prediction in eukaryotes with a generalized hidden Markov model that uses hints from external sources. *BMC Bioinformatics* [Internet]. 2006;7:62. Available from: <http://www.ncbi.nlm.nih.gov/pubmed/16469098>

Figure 1

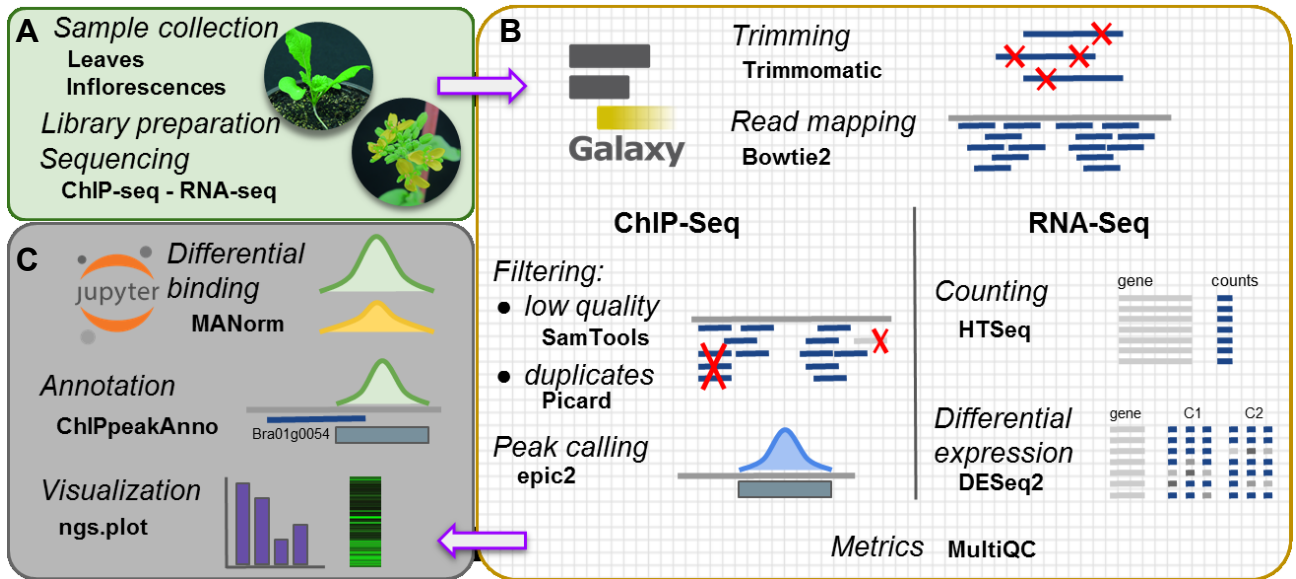



Figure 2

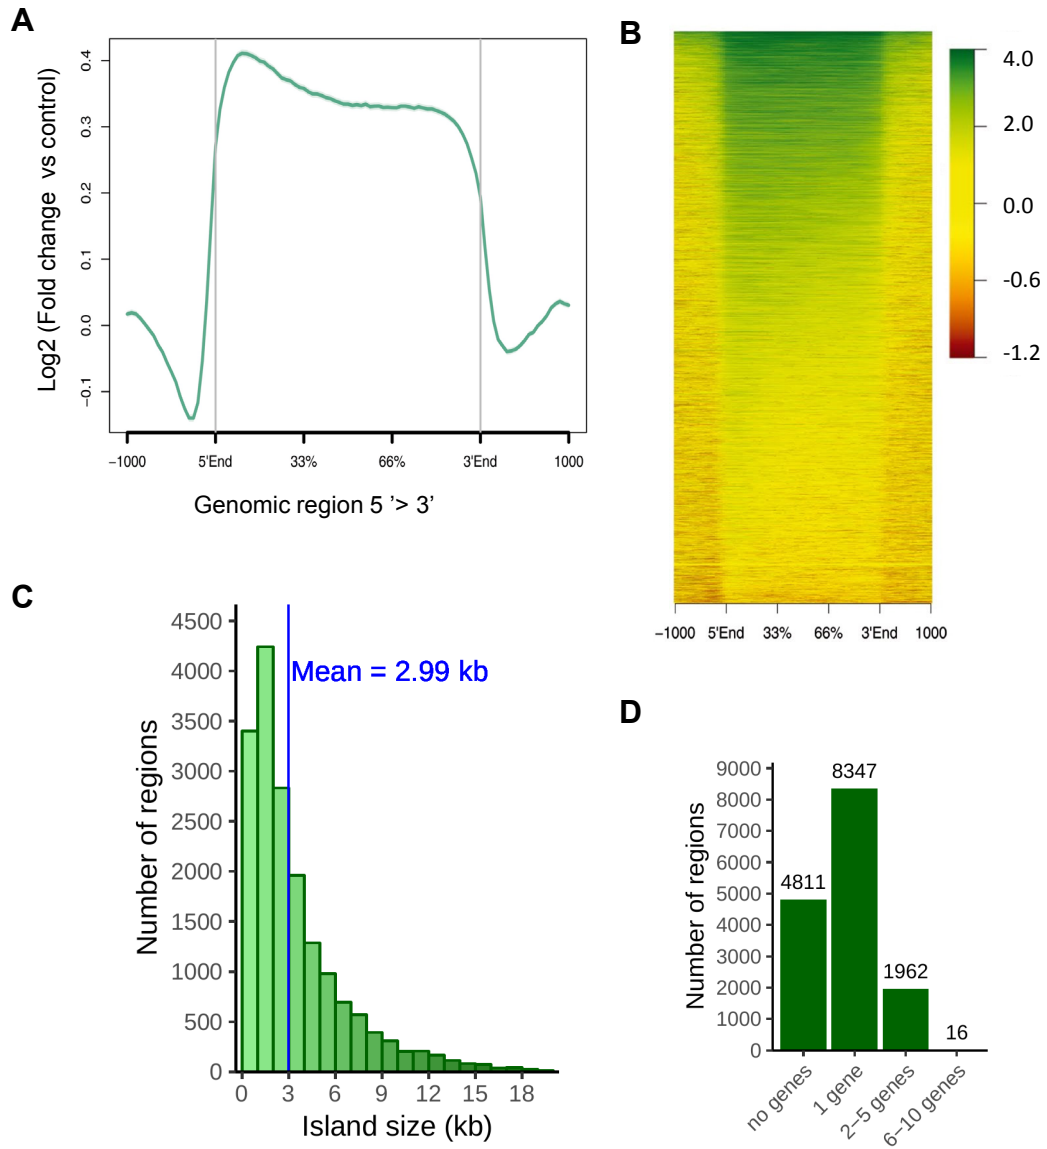

Figure 3

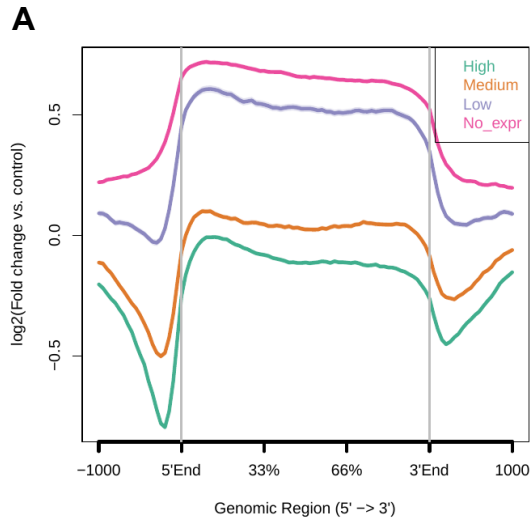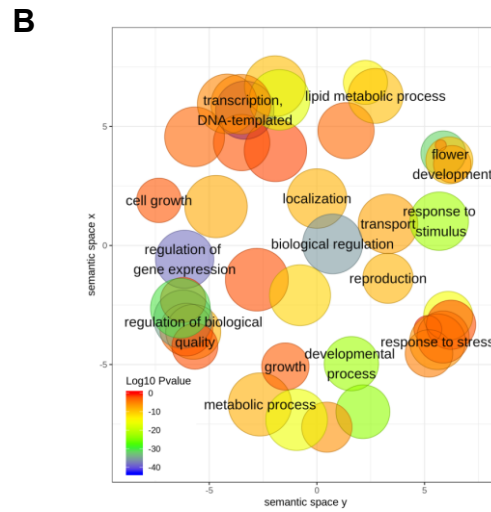

Figure 4

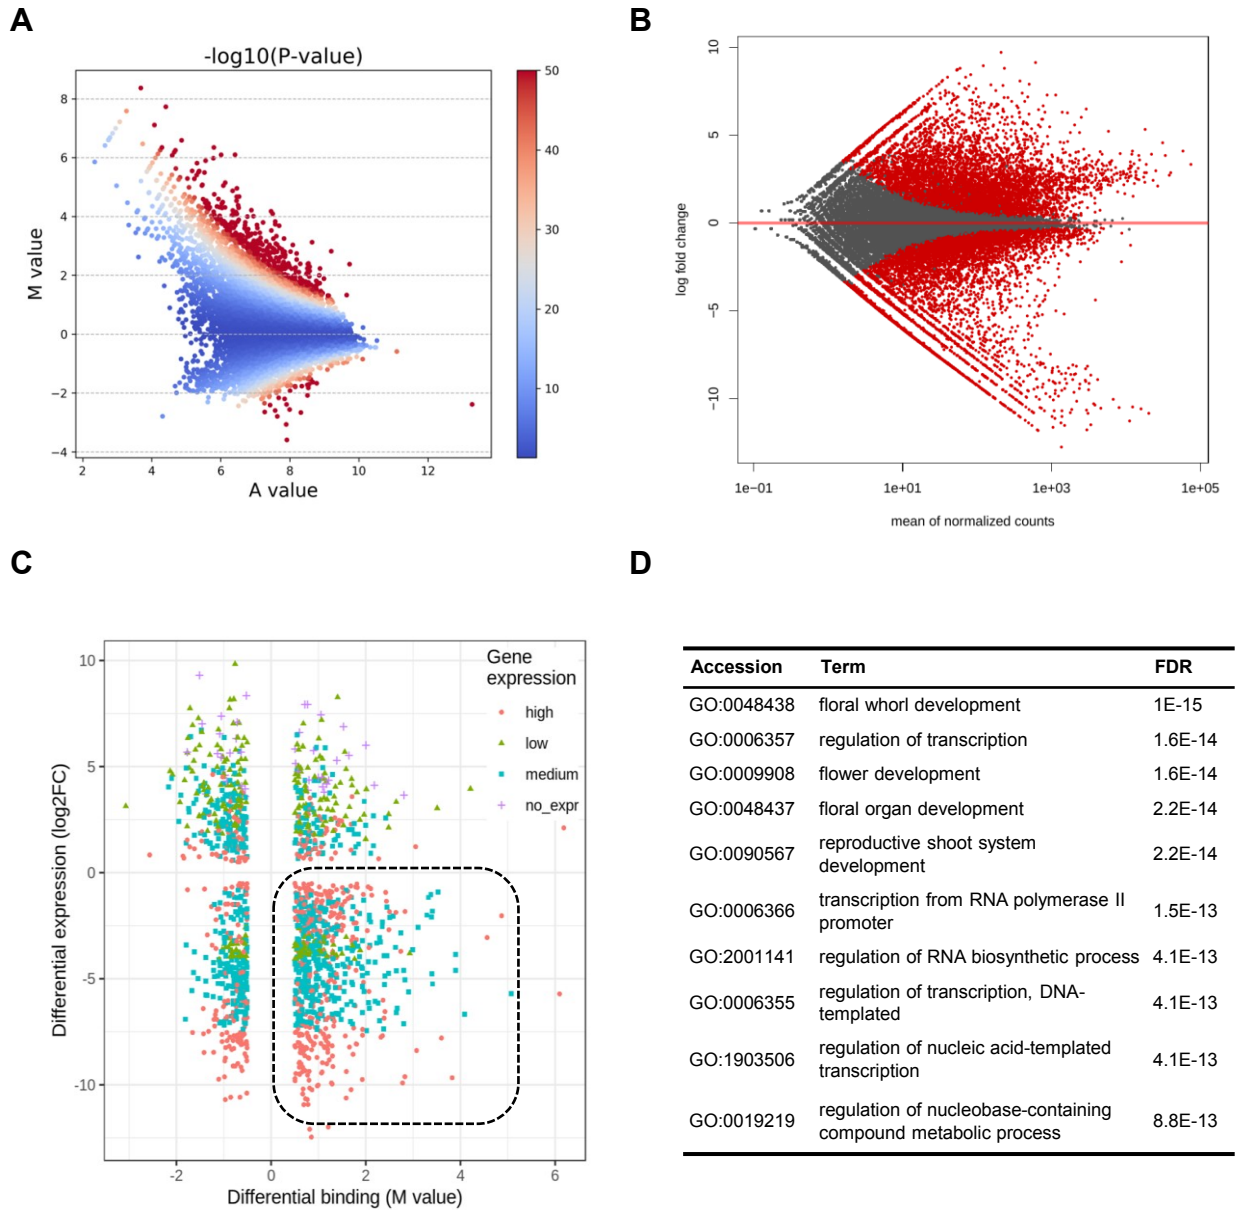

Figure 5

A

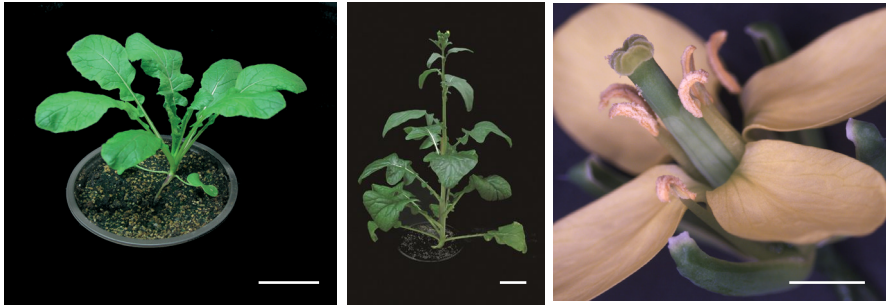

B

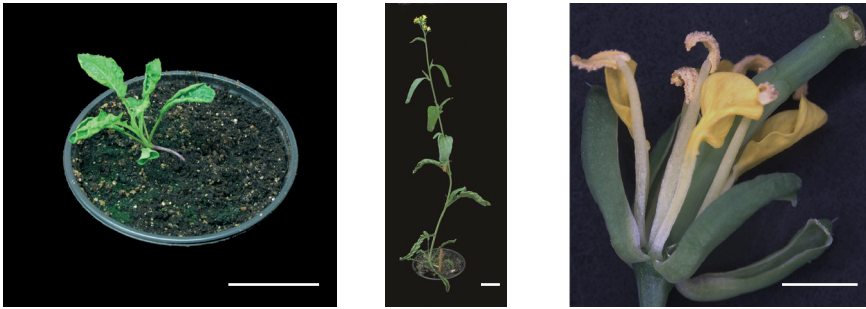

Figure 6

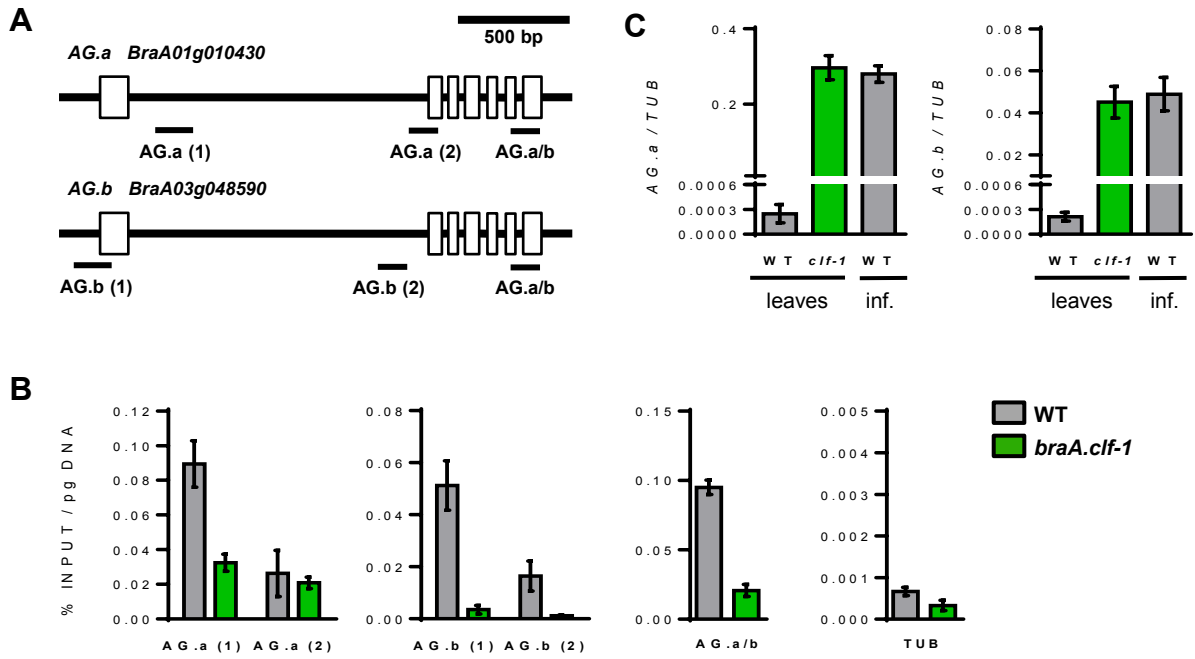



Click here to access/download  
**Supplementary Material**  
Additional File 1.pdf





Click here to access/download  
**Supplementary Material**  
Additional File 2.docx



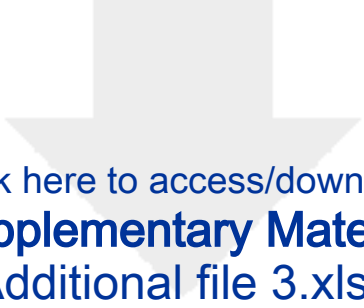

Click here to access/download  
**Supplementary Material**  
Additional file 3.xlsx





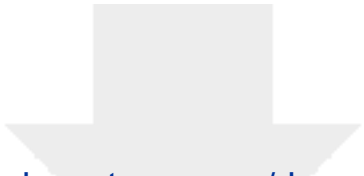

Click here to access/download  
**Supplementary Material**  
Additional File 4s.xlsx



Supplement: giz147_giga-d-19-00256_original_submission.pdf [file giz147_giga-d-19-00256_original_submission.pdf]
